# Supplementary material for: The effects of rosette nanotubes with different functionalizations on channel catfish (Ictalurus punctatus) lymphocyte viability and receptor function
Source: Royal Society of Chemistry journal article supplement (doi:10.1039/c6en00024j), 2016-01-01
Supplement: c6en00024j1.pdf [file c6en00024j1.pdf]

## Supplemental Tables

**Supplemental Table 1. Additional characterization data for rosette nanotubes from select publications.**

| Source | Functionalization | Media              | Characterization Technique         | Measurement                                                    |
|--------|-------------------|--------------------|------------------------------------|----------------------------------------------------------------|
| 1      | crown ether       | water              | DLS (20, 30, 40 °C)<br>SAXS<br>TEM | 25.3, 52.7, 81.3 nm<br>3.6 nm diameter<br>3.9 nm diameter      |
| 2      | lysine            | MES buffer         | DLS<br>TEM                         | 30.4 nm<br>4.0 nm diameter<br>60 nm length<br>(average)        |
| 3      | lysine            | water              | TEM                                | 3.5 nm diameter                                                |
| 4      | lysine            | titanium substrate | TEM                                | 3.4 nm diameter                                                |
| 5      | lysine            | water              | AFM<br>DLS<br>TEM<br>AFM           | 3.1 nm diameter<br>36 nm<br>3.4 nm diameter<br>3.2 nm diameter |

**References:** <sup>1</sup> Fenniri et al. (2002) <sup>2</sup> Fenniri et al. (2001) <sup>3</sup> Fine et al. (2009) <sup>4</sup> Chun et al. (2005) <sup>5</sup> Moralez et al. (2005)

**Abbreviations:** (DLS) – dynamic light scattering, reported as hydrodynamic radius ( $R_H$ ); (SAXS) – small angle x-ray scattering; (TEM) – transmission electron microscopy; (AFM) – atomic force microscopy

**Supplemental Table 2. Dosing metric conversions for lysine-functionalized rosette nanotubes.**

| Functionalization | Molar Mass (g/mol) | Surface Area (m <sup>2</sup> /g) | Equivalent Nanomaterial Dosing Metrics |                                    |                                             |
|-------------------|--------------------|----------------------------------|----------------------------------------|------------------------------------|---------------------------------------------|
|                   |                    |                                  | Mass Per Volume (mg/L)                 | Particle Number per Volume (mol/L) | Surface Area per Volume (m <sup>2</sup> /L) |
| K-RNT             | 564.89             | 2.5x10 <sup>3</sup>              | 10                                     | 1.77 x 10 <sup>-5</sup>            | 25                                          |
|                   |                    |                                  | 50                                     | 8.85 x 10 <sup>-5</sup>            | 125                                         |
|                   |                    |                                  | 100                                    | 1.77 x 10 <sup>-4</sup>            | 250                                         |

## Supplemental Figures

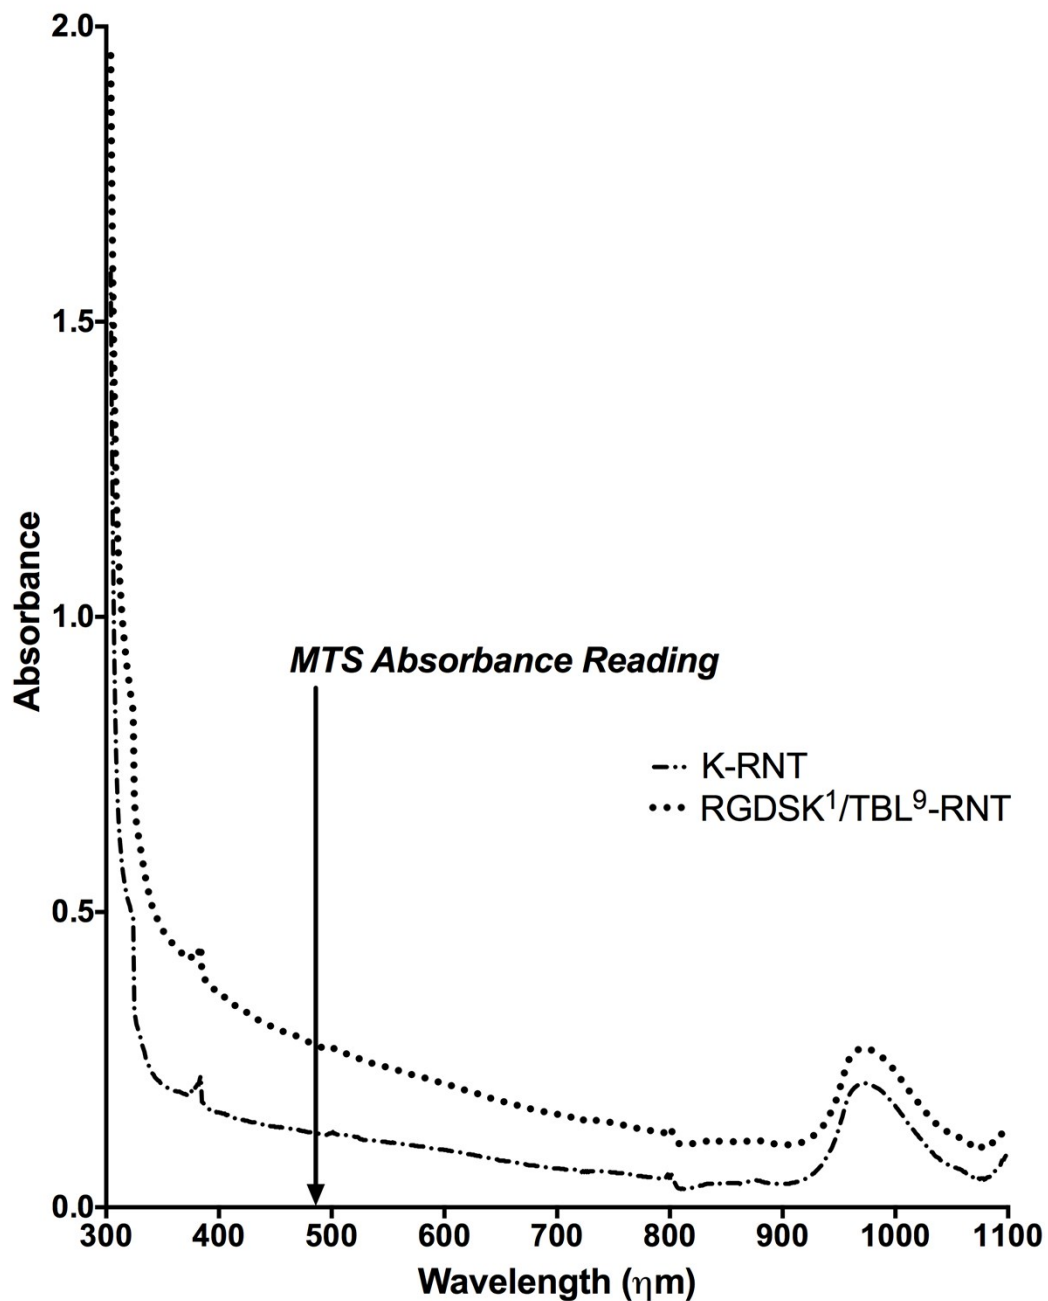

**Supplemental Figure 1. RNTs absorb light at wavelengths important for toxicological assays.** A 300-1100 nm absorbance spectrum for 100 mg L<sup>-1</sup> suspensions of K- and RGDSK<sup>1</sup>/TBL<sup>9</sup>-RNTs demonstrates the intrinsic optical properties of these materials. Significant absorbance at 490 nm suggests potential interference with MTS assay outputs.

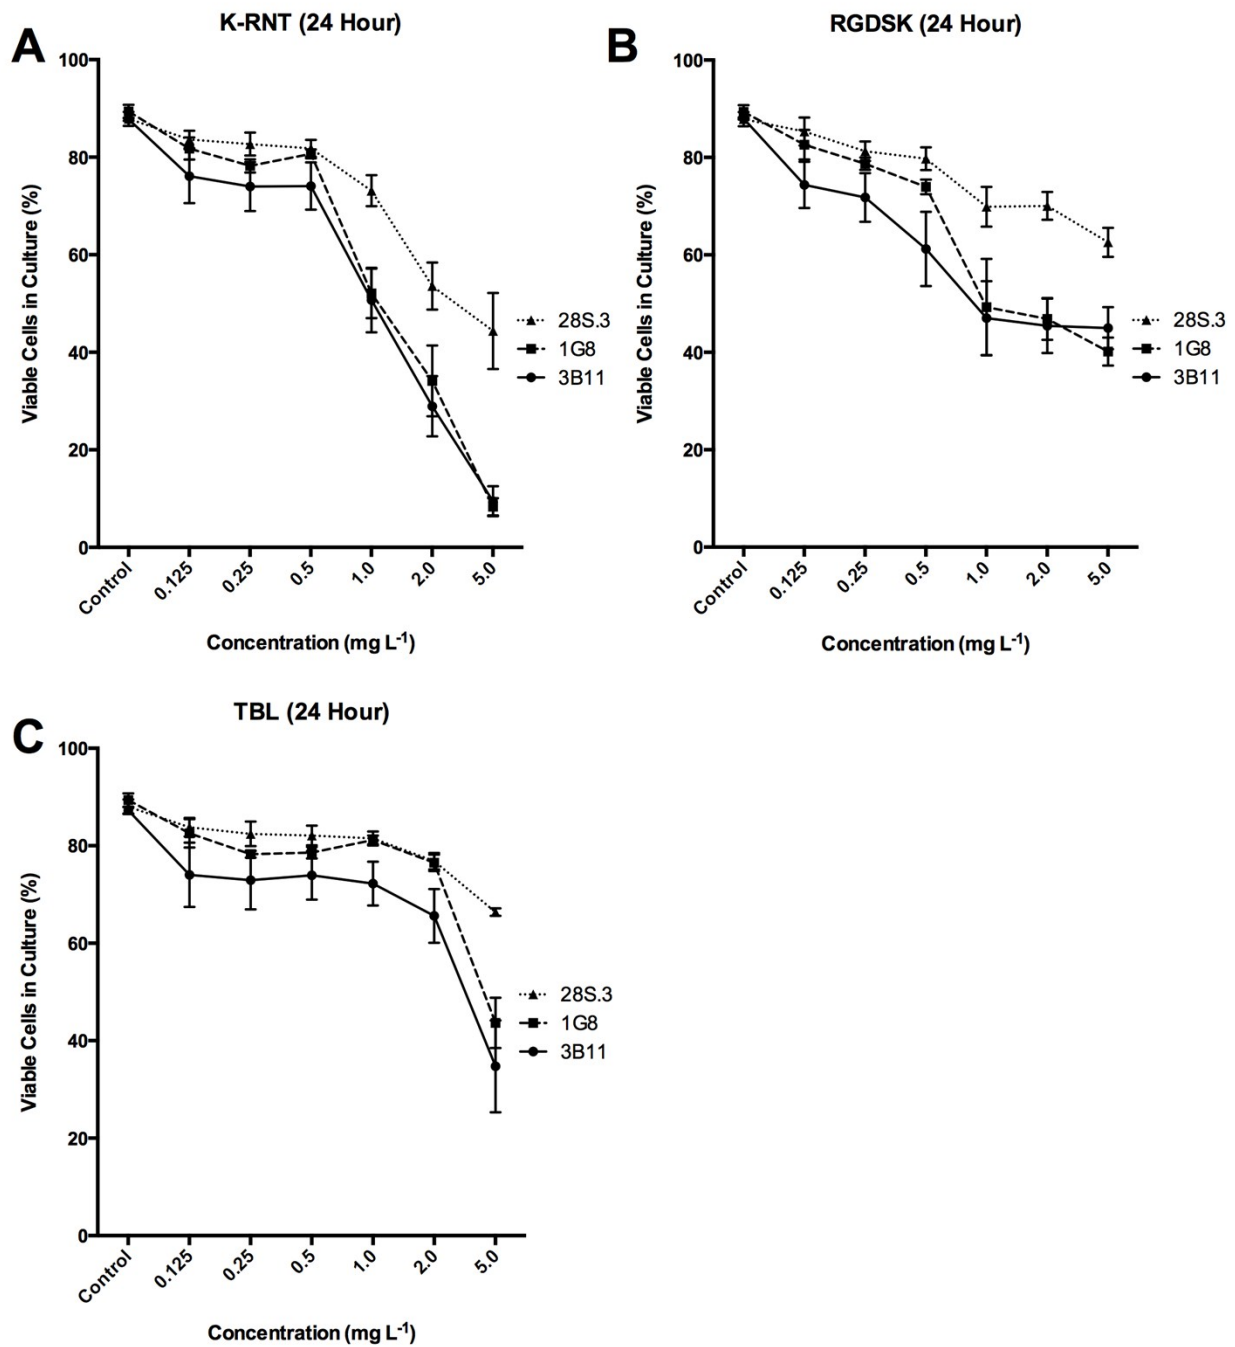

**Supplemental Figure 2. 3B11, 1G8 and 28S.3 response to RNT exposure was cell-line dependent.** Flow cytometric data grouped by functionalization allowed a more direct comparison between cell-lines.  $2.0 \times 10^4$  3B11, 1G8 or 28S.3 cells were incubated with 0.125, 0.25, 0.5, 1.0, 2.0 or 5.0 mg L<sup>-1</sup> (A) K-RNT, (B) TBL-RNT or (C) RGDSK<sup>1</sup>/TBL<sup>9</sup>-RNT for 24 h. At high concentrations (1, 2 and 5 mg L<sup>-1</sup> RNT), the response of 3B11 and 1G8 cell lines was similar, and significantly different, from 28S.3 cells. Data were analyzed by three-way ANOVA with a Holm-Sidak *post hoc* test ( $p < 0.05$ ). Means  $\pm$  SEM are shown,  $n = 5$ .
